# Supplementary material
Source: PubMed Central journal article supplement (PMC9617853)
Supplement: 41467_2022_34111_MOESM2_ESM.pdf [file 41467_2022_34111_MOESM2_ESM.pdf]

### **Description of Additional Supplementary Files**

File Name: Supplementary Data 1

Description: Normalized sgRNA read counts from the CRISPR activation screen. Related to Fig 1b.

File Name: Supplementary Data 2

Description: MAGeCK gene rank analysis of the CRISPR activation screen. Gene rank analysis was completed on normalized reads after the third round of infection with respect to the input replicates as a control. Related to Fig 1c.

File Name: Supplementary Data 3

Description: Quantification of MALDI-TOF peaks of N-linked glycans released from mCherry or B3GAT1 A549 cells. Related to Fig 2e and Fig 2f.
